# Supplementary material for: Standard −20 °C freezer storage protocols may cause substantial plasma renin cryoactivation
Source: publisher site journal article supplement (doi:10.1515/cclm-2022-1190), 2023-02-19
Supplement: Supplementary file 1 [file j_cclm-2022-1190_suppl.docx]

| Baseline renin (mIU/L) | Percentage (%) difference in renin concentration from baseline after storage using standard -20 °C conditions |
| --- | --- |
| 4.0 | 205 |
| 4.3 | 213 |
| 5.1 | 20.8 |
| 5.6 | 332 |
| 10.0 | 21.9 |
| 12.2 | 127 |
| 16.0 | 139 |
| 17.5 | 203 |
| 20.8 | 3.8 |
| 20.8 | 195 |
| 21.1 | 132 |
| 22.4 | 98.8 |
| 26.7 | 9.1 |
| 27.7 | 3.1 |
| 28.2 | 64.4 |
| 30.6 | -8.6 |
| 31.9 | 99.2 |
| 32.2 | 15.1 |
| 41.2 | 6.5 |
| 52.0 | 7.1 |
| 52.5 | 8.3 |
| 56.5 | 4.5 |
| 58.0 | 27.5 |
| 61.6 | -4.3 |
| 64.0 | 0.3 |
| 93.8 | 41.7 |
| 107 | 0.8 |
| 117 | 57.8 |
| 117 | 2.7 |
| 204 | 1.7 |

**Supplementary Table 1:** Comparison of Baseline Renin Concentration with Observed Increase from Baseline
